# Supplementary material for: Reference production in Mandarin–English bilingual preschoolers: Linguistic, input, and cognitive factors
Source: Frontiers journal article supplement (doi:10.3389/fpsyg.2022.897031), 2022-09-29
Supplement: Data_Sheet_1.PDF [file Data_Sheet_1.PDF]

## Coding Rubrics

### Referential forms

| Referential forms | Mandarin                                                                                                                                                                                                                                           | English                                                                                                                                                                      |
|-------------------|----------------------------------------------------------------------------------------------------------------------------------------------------------------------------------------------------------------------------------------------------|------------------------------------------------------------------------------------------------------------------------------------------------------------------------------|
| Nominals          | + <b>[Num-CI-N]</b><br>e.g., <i>Lai le yi zhi mao.</i> ‘There comes a cat.’<br><i>Liang zhi xiaoniao hen haipa.</i> ‘The two birds are very scared.’                                                                                               | + <b>[Indef./Def./Num. determiner-NP]</b><br>e.g., <i>There comes <u>a cat</u>. <u>The birds</u> are scared. There are <u>two birds</u>.</i>                                 |
|                   | + <b>Bare noun</b><br>e.g., <i>You <u>mao</u>.</i> ‘There is a cat. / There are cats.’<br><i><u>Huli</u> hen e.</i> ‘The fox is very hungry.’                                                                                                      | + <b>No determiner singular N (used as a proper noun)</b><br>e.g., <i><u>Cat</u> is so naughty.</i>                                                                          |
|                   | + <b>Demonstrative NP</b><br>e.g., <i>na zhi yang</i> ‘that goat’                                                                                                                                                                                  | + <b>Demonstrative NP</b><br>e.g., <i>that goat</i>                                                                                                                          |
|                   | + <b>Kinship term</b><br>e.g., <i>mama</i> ‘Mommy’                                                                                                                                                                                                 | + <b>Kinship term</b><br>e.g., <i>Mommy</i>                                                                                                                                  |
|                   | + <b>Complex NP containing a possessor, a relative clause, or adjectival modification</b><br>e.g., <i>ta (de) mama</i> ‘her mother’, <i>diaojin shuili de yang</i> ‘the goat who just dropped into the water’, <i>hei de niao</i> ‘the black bird’ | + <b>Complex NP containing a possessor, a relative clause, or adjectival modification</b><br>e.g., <i>her babies, the goat who just dropped into the water, little birds</i> |
| Pronominals       | + <b>Personal pronoun</b><br>e.g., <i>ta</i> ‘it’                                                                                                                                                                                                  | + <b>Personal pronoun</b><br>e.g., <i>it</i>                                                                                                                                 |
|                   | + <b>Demonstrative</b><br>e.g., <i>zhe(ge)</i> ‘this’, <i>na(ge)</i> ‘that’                                                                                                                                                                        | + <b>Demonstrative</b><br>e.g., <i>this, that</i>                                                                                                                            |
| Null forms        | + <b>Null subject/object</b><br>e.g., <i>zhuadao le.</i> ‘[It] got [the bird].’                                                                                                                                                                    | – <b>Null subject/object</b><br>e.g., <i>*[It] got [the bird].</i>                                                                                                           |
| Others            | N/A                                                                                                                                                                                                                                                | + <b>nonspecific lexical items</b><br>e.g., <i>someone</i>                                                                                                                   |

Notes: ‘+’ = allowed, ‘–’ = disallowed, ‘\*’ = ungrammatical, ‘[]’ = lexically unrealized

### Syntactic position of first mentions

| Syntactic position | Examples (target referential form underlined)              |                                                                                                                                 |                                                                                                             |
|--------------------|------------------------------------------------------------|---------------------------------------------------------------------------------------------------------------------------------|-------------------------------------------------------------------------------------------------------------|
|                    | Mandarin                                                   |                                                                                                                                 | English                                                                                                     |
| Preverbal          | Canonical subject                                          | <i>Zai shuxia de <u>xiaomao</u> kanjian le shushing de <u>xiaoniao</u></i><br>'A cat under the tree saw the birds in the tree.' | <i><u>The cat</u> saw the birds.</i>                                                                        |
|                    | NP in <i>ba</i> -construction                              | <i>Xiang yao ba <u>xiaoyang</u> chi diao.</i><br>'[The fox] wanted to have the little goat eaten up.'                           | N/A                                                                                                         |
| Postverbal         | Canonical object                                           | <i>Ta zhengzai wei <u>ta de niaobaobao</u>.</i> 'She's feeding her baby birds.'                                                 | <i>The cat caught <u>a bird</u>.</i>                                                                        |
|                    | SV inversion                                               | <i>Shu xia ye lai le <u>yi zhi xiaohuanggou</u>.</i> 'Under the tree there comes a little yellow dog.'                          | <i>Along came <u>a cat</u>.</i>                                                                             |
|                    | NP after <i>you</i> (there be) in existential construction | <i>You <u>yizhi huli</u> lai le.</i> 'There is a fox coming.'                                                                   | <i>There is <u>a cat</u> looking at his baby.</i>                                                           |
| Unanalysable       | NP-only                                                    | <i>Liangzhi <u>xiaoyang</u>.</i> 'Two baby goats.'                                                                              | <i><u>A cat</u>.</i>                                                                                        |
|                    | Verbal predicate missing                                   | N/A                                                                                                                             | <i><u>The three little goats</u> the grass on there.</i><br><br><i><u>The small sheep</u> in the water.</i> |

### Discourse functions

*Discourse function* was coded largely following Serratrice (2007), with reference to Colozzo and Whitely (2014). The unit of analysis is "clause" defined by the presence of a verbal predicate (Serratrice, 2007). The verbal predicates are mainly verbs and may include adjectives in Mandarin.

Introduction: the very first mention of the referent (including NP-only).

Reintroduction: reference involving topic shift across adjacent clauses.

To be coded as reintroduction, a referential form must meet one of the following criteria: (i) it is a subject/object argument referring to a previously identified referent which has not been mentioned in the immediately preceding clause; (ii) it is a subject argument and has been mentioned in the adjacent clause as a non-subject (e.g., an object, or an adjunct); or (iii) the reference shifts from two or more characters together to only one of these characters (and vice versa). All subsequent mentions other than reintroduction were coded as maintenance.

Sample coding of discourse functions in English and Mandarin Chinese is provided below.

Sample coding of discourse functions in English (target referential form underlined)

| Unit ID | Clause                                                                           | Referent                  | Function       |
|---------|----------------------------------------------------------------------------------|---------------------------|----------------|
| 1       | there is <u>a goat</u> in the pond .                                             | Baby goat1                | Introduction   |
| 2       | <the other> [/] <u>the goat in the pond</u> ask for the other goat for help .    | Baby goat1                | Reintroduction |
| 2       | <the other> [/] the goat in the pond ask for <u>the other goat</u> for help .    | Mommy goat                | Introduction   |
| 3       | <u>the other goat</u> push him out of the [/] the pond                           | Mommy goat                | Reintroduction |
| 3       | the other goat push <u>him</u> out of the [/] the pond                           | Baby goat1                | Maintenance    |
| 4       | when <the the goat> [/] <u>the other goat</u> was eating grass .                 | Baby goat2                | Introduction   |
| 5       | <u>the wolf</u> wanted to eat the [/] the one in the pond .                      | Fox                       | Introduction   |
| 5       | the wolf wanted to eat the [/] <u>the one in the pond</u> .                      | Baby goat1                | Reintroduction |
| 6       | so then the [/] <u>the wolf</u> come                                             | Fox                       | Maintenance    |
| 7       | and $\phi$ chase the [/] the goat .                                              | Fox                       | Maintenance    |
| 7       | and $\phi$ chase the [/] <u>the goat</u> .                                       | Baby goat2                | Reintroduction |
| 8       | and $\phi$ pull one of the goat's leg .                                          | Fox                       | Maintenance    |
| 9       | <u>he</u> almost fell                                                            | Baby goat2                | Reintroduction |
| 10      | when <u>two of them</u> was drinking water .                                     | Baby goat1 and Mommy goat | Reintroduction |
| 11      | <u>the bird on the tree</u> was so angry                                         | Crow                      | Introduction   |
| 12      | that he [/] <u>the bird</u> flew to the [/] the wolf                             | Crow                      | Maintenance    |
| 12      | that he [/] the bird flew to the [/] <u>the wolf</u>                             | Fox                       | Reintroduction |
| 13      | and $\phi$ bite his [/] his tail .                                               | Crow                      | Maintenance    |
| 14      | then the [/] the wolf , I [/] I mean , <u>the goat</u> was so happen [/] happy . | Baby goat2                | Reintroduction |

Notes: Units with more than one referential form are repeated as many times as the number of referential forms they contain.  $\phi$  = null form.

Transcription follows the CHAT-format (MacWhinney, 2000): "[/]" indicates self-correction and "[/]" self-repetition.

Sample coding of discourse functions in Mandarin Chinese (target referential form underlined)

| Unit ID | Clause                             | Referent   | Function       |
|---------|------------------------------------|------------|----------------|
| 1       | 有一天, <u>一只小山羊</u> 在 草地上面吃草.        | Baby goat2 | Introduction   |
| 2       | 然后呢, <u>一只山羊</u> 不小心[:一不小心] 跑到水里面. | Baby goat1 | Introduction   |
| 3       | 然后 <u>那个大一点的山羊</u> 去救那个小山羊.        | Mommy goat | Introduction   |
| 3       | 然后 <u>那个大一点的山羊</u> 去救那个小山羊.        | Baby goat1 | Maintenance    |
| 4       | 突然, <u>一个狐狸</u> 看到那个小山羊在吃草.        | Fox        | Introduction   |
| 4       | 突然, 一个狐狸看到 <u>那个小山羊</u> 在吃草.       | Baby goat2 | Reintroduction |
| 5       | <u>它</u> 想要抓住那个山羊.                 | Fox        | Maintenance    |
| 5       | 它想要抓住 <u>那个山羊</u> .                | Baby goat2 | Maintenance    |
| 6       | 然后 然后呢, <u>那个大山羊</u> 看到它在吃草.       | Mommy goat | Reintroduction |
| 6       | 然后 然后呢, 那个大山羊看到 <u>它</u> 在吃草.      | Baby goat1 | Reintroduction |
| 7       | 然后呢, <u>那个小山羊</u> 刚刚在吃草的时候         | Baby goat2 | Reintroduction |
| 8       | $\phi$ 看到一只狐狸要抓它 xxx.              | Baby goat2 | Maintenance    |
| 8       | $\phi$ 看到 <u>一只狐狸</u> 要抓它 xxx.     | Fox        | Reintroduction |
| 8       | $\phi$ 看到一只狐狸要抓 <u>它</u> xxx.      | Baby goat2 | Maintenance    |
| 9       | <u>它</u> 就要快跑走.                    | Baby goat2 | Maintenance    |
| 10      | 但是呢, <u>那个狐狸</u> 已经抓住它的脚了.         | Fox        | Reintroduction |
| 11      | 然后 <u>一只鸟</u> 看见.                  | Crow       | Introduction   |
| 12      | <u>它</u> 想要救那个羊.                   | Crow       | Maintenance    |
| 12      | 它想要救 <u>那个羊</u> .                  | Baby goat2 | Reintroduction |
| 13      | 然后 <那一> <u>那个鸟</u> 快快把 狐狸的 尾巴给咬住.  | Crow       | Maintenance    |
| 14      | 然后 <u>那个狐狸</u> 它觉得很痛.              | Fox        | Reintroduction |
| 14      | 然后 那个狐狸 <u>它</u> 觉得很痛.             | Fox        | Maintenance    |
| 15      | 然后 <它就> <u>它</u> 就把 把手松掉.          | Fox        | Maintenance    |
| 16      | 然后 <u>那个山羊</u> 看到它.                | --         | --             |
| 16      | 然后 那个 <u>它</u> 看到它.                | Fox        | Maintenance    |

Sample coding of discourse functions in Mandarin Chinese (*continued*)

| Unit ID | Clause                                           | Referent                    | Function       |
|---------|--------------------------------------------------|-----------------------------|----------------|
| 17      | <u>它</u> 说 +"/.                                  | Baby goat2                  | Maintenance    |
| 17      | + " 嗯 ?                                          | --                          | --             |
| 18      | 然后呢, <u>它</u> [/] <u>它们</u> 就被救了.                | Baby goat1&2 and Mommy goat | Reintroduction |
| 19      | 然后 <u>那个大</u> [/] <u>大一点的</u> 山羊 xxx <u>它们</u> . | Mommy goat                  | Reintroduction |
| 19      | 然后 <u>那个大</u> [/] <u>大一点的</u> 山羊 xxx <u>它们</u> . | Baby goat1&2                | Reintroduction |
| 20      | 然后 <那 只 鸟> [///] <u>狐狸</u> 跑 走 的 时 候 ,           | Fox                         | Reintroduction |
| 21      | <u>那 只 鸟</u> 还 在 追 那 个 <u>狐狸</u> .               | Crow                        | Reintroduction |
| 21      | <u>那 只 鸟</u> 还 在 追 <u>那个狐狸</u> .                 | Fox                         | Maintenance    |

Notes: Units with more than one referential form are repeated as many times as the number of referential forms they contain.  $\phi$  = null form.

Transcription follows the CHAT-format (MacWhinney, 2000): "[//]" indicates self-correction, "[/]" self-repetition, "xxx" unintelligible words, "[?]" unclear, "+"/" start of direct speech from next line, "+" direct speech, and "[///]" false start.
